# Supplementary material for: A systematic screen for genes expressed in definitive endoderm by Serial Analysis of Gene Expression (SAGE)
Source: PubMed Central journal article supplement (PMC1950885; doi:10.1186/1471-213x-7-92), 2007-08-02
Supplement: 1471-213X-7-92-S3.pdf [file 1471-213X-7-92-S3.pdf]

Additional file 3: Primers used for RT-qPCR

| gene symbol    | primers                  |                          |
|----------------|--------------------------|--------------------------|
|                | Forward                  | Reverse                  |
| <i>Pyy</i>     | CAGTGGTGAAGACTCCCCAAG    | TGAACACACACAGCCCTCCAG    |
| <i>Trh</i>     | TGGTGCTGCTCTAGATTCCTGGAT | TTCGGCTTCAACGTCTTCCTCCTT |
| <i>Prrx2</i>   | CCGTGCCTTTTCTCCATCACAG   | GCCACCATAGCAGTGACTTGTTT  |
| <i>Otx2</i>    | GCTGAACATTCCAGTTTTAGCCAG | CTTTTTCCTTCTATGCCTCTCGG  |
| <i>Tbx1</i>    | AAGGCAGGCAGACGAATGTTT    | GTCATCTACGGGCACAAAGTCC   |
| <i>Cyp26a1</i> | CCATTCTTTGGGAAACATTGC    | TGCGTCTTGTAGATGAAGCCG    |
| <i>Hoxb6</i>   | GGTTCAATGGTAGATTCGCTGTCC | ATGTGCTCCTTCCAGTGGCTTTGG |
| <i>Cdx1</i>    | GGAGAGTAGGCGGCATTGAAAG   | AAGTGAGGCTGGAAGAGGAGACAG |
