# Supplementary material for: A systematic screen for genes expressed in definitive endoderm by Serial Analysis of Gene Expression (SAGE)
Source: PubMed Central journal article supplement (PMC1950885; doi:10.1186/1471-213x-7-92), 2007-08-02
Supplement: 1471-213X-7-92-S4.pdf [file 1471-213X-7-92-S4.pdf]

Additional file 4: Primers for amplification of the cDNA fragment for *in situ* probes

| gene symbol     | Primer                    |                           |
|-----------------|---------------------------|---------------------------|
|                 | Forward                   | Reverse                   |
| <i>Pyy</i>      | TCCTGCTCATCTTGCTTCGG      | TGAACACACACAGCCCTCCAG     |
| <i>Trh</i>      | TGGATGGAGTCTGATGTCACCAAG  | TGGCTCTTTGAAGTTCCTGAAGTG  |
| <i>Prrx2</i>    | CTACCACGATGAGCCCAGATTATC  | GCCACCATAGCAGTGACTTGTTCC  |
| <i>Otx2</i>     | GCTCAACTTCCTACTTTGGGGG    | CTTTTTCTTCTATGCCTCTCGG    |
| <i>Tbx1</i>     | AAGGCAGGCAGACGAATGTTC     | TTCCGAGAGCGAGCAAAGGCACTC  |
| <i>Cyp26a1</i>  | GCAGGCACTAAAACAATCGTCAAC  | ACATCGTGGGTGTACAGATACTG   |
| <i>Hoxb6</i>    | AGGAAAAGCCAGCCGAGTGAAG    | CAGCGAATCTACCATTGAACCG    |
| <i>Cdx1</i>     | CCGTCAAGGAGGAGTTTCTACCC   | CGAGTTCTGTCTCAAGAGCAGTGG  |
| <i>Has2</i>     | CAAAGGAAAGTTGGAAAGCCACTG  | CAAAGACTGCCACCATCTCTCC    |
| 5730521E12Rik   | GCATTCTCCACCACCAAGAG      | TGACAGGTAAGATGGGACAGGTTCC |
| <i>Cldn9</i>    | ATACAGATGAGCGGGACCTAAGG   | TGAACGGGAAGGGATGGAGTAG    |
| <i>Habp2</i>    | AAGACTGTATGTTTGCCACGCG    | CTTGTTGGTTCCAGAGAGAAAAG   |
| <i>Spp2</i>     | GTGACAAGAATAAGACAGCCACCC  | CAGTGAGCCCACACATCCTTTAC   |
| <i>Ttr</i>      | CCTCGCTGGACTGGTATTTGTG    | TTGGGTTTTAGGAGCAGGGG      |
| <i>Cpn1</i>     | GGGTATCTGGTTGGTAGGAACAATG | GGGTCTTTCTTTCTGGATGTCCG   |
| 1700011H14Rik   | AAAAGGCATCCACCCCGAAG      | CAAGGCTATTCACCACAAGATTCC  |
| <i>Mogat2</i>   | CGCTCCTATCTGATGATGCTGAC   | TGACTGCTTTTTCCCCATTCTAC   |
| <i>Spink3</i>   | GGAAGCACCTGTATAGTTCT      | GTTTCAGATGCATTTATTCAAC    |
| <i>Phlda2</i>   | CATCCTCAAGGTGGACTGCG      | CGGAATGGTGGGTTGGAAGC      |
| <i>Trap1a</i>   | CGCCCTTTATGAGGAGCAGTATG   | AAACAACCACTTCTTCCGCTG     |
| <i>Tdh</i>      | CCTGCGTTATCCTGGAATCATTTCC | AGCATCGTAGCCACCAACTCTG    |
| <i>Lgals2</i>   | CCACCATTGTCTGTAACACCAGTG  | CCTTGACCTTGGGGAAAAGC      |
| <i>Cubn</i>     | CCAGCAGGTCCAGATAACTGTGTG  | TCGTTGCCAAAAGAGTCCC       |
| <i>Pla2g12b</i> | CTGTGATTCTCTGGCTGATACCG   | AATGTGAGGTGTCAACTGGCAAC   |
| <i>Apoc2</i>    | GGCTTGATGAGAACAGGAGACTTC  | TGATGCGAGCAAAGAGGCG       |
| <i>Gabpb1</i>   | GGGAACTTCTCCACTTCATCTGG   | TGTCAATACTTGCTGTCCATCGG   |
| <i>Arg1</i>     | GAAGAATGGAAGAGTCAGTGTGGTG | GAGGAGAAGGCGTTTGCTTAGC    |
| <i>Gm784</i>    | TTGCCGTTACAGCCCTTAC       | TTTGCTTGAGACAGTGCCCC      |
| A230098A12Rik   | TGGCGATTCTGATGGGGATG      | TGGAGCAAAGGGAAAGGTGG      |
| <i>Usp22</i>    | TAGGCAGGGGATGGATGTCTTCAG  | AACACAGAATGGAGGCAAGCGG    |
